# Supplementary material for: Determinants of user acceptance of a specific social platform for older adults: An empirical examination of user interface characteristics and behavioral intention
Source: PubMed Central journal article supplement (PMC5570369; doi:10.1371/journal.pone.0180102), 2017-08-24
Supplement: pone.0180102.s001.pdf [file pone.0180102.s001.pdf]

## Appendix 1: Treit Heuristic Evaluation

| <b>H1. Consistency</b>                                                                                                                                                                          |           |              |                          |                          |                          |                          |                          |
|-------------------------------------------------------------------------------------------------------------------------------------------------------------------------------------------------|-----------|--------------|--------------------------|--------------------------|--------------------------|--------------------------|--------------------------|
| Consistency and standards. Users should not have to wonder whether different words, situations, or actions mean the same thing. Standards and conventions in product design should be followed. |           |              |                          |                          |                          |                          |                          |
| Item                                                                                                                                                                                            | Comments  |              | Very unsatisfied         | Unsatisfied              | Neutral                  | Satisfied                | Very satisfied           |
|                                                                                                                                                                                                 | Advantage | Disadvantage | 1                        | 2                        | 3                        | 4                        | 5                        |
| Sequences of actions (skill acquisition).                                                                                                                                                       |           |              | <input type="checkbox"/> | <input type="checkbox"/> | <input type="checkbox"/> | <input type="checkbox"/> | <input type="checkbox"/> |
| The system uses different colors to categorize different items.                                                                                                                                 |           |              | <input type="checkbox"/> | <input type="checkbox"/> | <input type="checkbox"/> | <input type="checkbox"/> | <input type="checkbox"/> |
| Layout and position (spatial consistency).                                                                                                                                                      |           |              | <input type="checkbox"/> | <input type="checkbox"/> | <input type="checkbox"/> | <input type="checkbox"/> | <input type="checkbox"/> |
| Font, capitalization (levels of organization).                                                                                                                                                  |           |              | <input type="checkbox"/> | <input type="checkbox"/> | <input type="checkbox"/> | <input type="checkbox"/> | <input type="checkbox"/> |
| Terminology (delete, del, remove, rm) and language (words, phrases).                                                                                                                            |           |              | <input type="checkbox"/> | <input type="checkbox"/> | <input type="checkbox"/> | <input type="checkbox"/> | <input type="checkbox"/> |
| Standards (e.g., blue underlined text for unvisited hyperlinks).                                                                                                                                |           |              | <input type="checkbox"/> | <input type="checkbox"/> | <input type="checkbox"/> | <input type="checkbox"/> | <input type="checkbox"/> |
| <b>H2. Visibility:</b>                                                                                                                                                                          |           |              |                          |                          |                          |                          |                          |
| Visibility of system state. Users should be informed about what is going on with the system through appropriate feedback and display of information.                                            |           |              |                          |                          |                          |                          |                          |
| Item                                                                                                                                                                                            | Comments  |              | Very unsatisfied         | Unsatisfied              | Neutral                  | Satisfied                | Very satisfied           |

|                                                                          | Advantage | Disadvantage | 1                        | 2                        | 3                        | 4                        | 5                        |
|--------------------------------------------------------------------------|-----------|--------------|--------------------------|--------------------------|--------------------------|--------------------------|--------------------------|
| The interface shows the current state of the system.                     |           |              | <input type="checkbox"/> | <input type="checkbox"/> | <input type="checkbox"/> | <input type="checkbox"/> | <input type="checkbox"/> |
| The interface shows what can be done in the current state.               |           |              | <input type="checkbox"/> | <input type="checkbox"/> | <input type="checkbox"/> | <input type="checkbox"/> | <input type="checkbox"/> |
| The interface shows where the user can go (e.g., providing a hyperlink). |           |              | <input type="checkbox"/> | <input type="checkbox"/> | <input type="checkbox"/> | <input type="checkbox"/> | <input type="checkbox"/> |
| The interface can show what change is made after an action.              |           |              | <input type="checkbox"/> | <input type="checkbox"/> | <input type="checkbox"/> | <input type="checkbox"/> | <input type="checkbox"/> |

### H3. Match

Match between system and world. The image of the system perceived by users should match the model the users have about the system.

| Item                                                                 | Comments  |              | Very unsatisfied         | Unsatisfied              | Neutral                  | Satisfied                | Very satisfied           |
|----------------------------------------------------------------------|-----------|--------------|--------------------------|--------------------------|--------------------------|--------------------------|--------------------------|
|                                                                      | Advantage | Disadvantage | 1                        | 2                        | 3                        | 4                        | 5                        |
| User model matches system image.                                     |           |              | <input type="checkbox"/> | <input type="checkbox"/> | <input type="checkbox"/> | <input type="checkbox"/> | <input type="checkbox"/> |
| Actions provided by the system match the actions performed by users. |           |              | <input type="checkbox"/> | <input type="checkbox"/> | <input type="checkbox"/> | <input type="checkbox"/> | <input type="checkbox"/> |
| Objects in the system match the objects of the task.                 |           |              | <input type="checkbox"/> | <input type="checkbox"/> | <input type="checkbox"/> | <input type="checkbox"/> | <input type="checkbox"/> |

### H4. Minimalist

Any extraneous information is a distraction and a slow-down.

| Item | Comments | Very unsatisfied | Unsatisfied | Neutral | Satisfied | Very satisfied |
|------|----------|------------------|-------------|---------|-----------|----------------|
|      |          |                  |             |         |           |                |

|                                                                                                                                                                          | Advantage | Disadvantage | 1                        | 2                        | 3                        | 4                        | 5                        |
|--------------------------------------------------------------------------------------------------------------------------------------------------------------------------|-----------|--------------|--------------------------|--------------------------|--------------------------|--------------------------|--------------------------|
| The interface provides concise information. Less is more.                                                                                                                |           |              | <input type="checkbox"/> | <input type="checkbox"/> | <input type="checkbox"/> | <input type="checkbox"/> | <input type="checkbox"/> |
| Though the system provides simple information, it is not equivalent to abstract and general.                                                                             |           |              | <input type="checkbox"/> | <input type="checkbox"/> | <input type="checkbox"/> | <input type="checkbox"/> | <input type="checkbox"/> |
| The system provides simple information and makes it efficient to operate.                                                                                                |           |              | <input type="checkbox"/> | <input type="checkbox"/> | <input type="checkbox"/> | <input type="checkbox"/> | <input type="checkbox"/> |
| Progressive levels of details.                                                                                                                                           |           |              | <input type="checkbox"/> | <input type="checkbox"/> | <input type="checkbox"/> | <input type="checkbox"/> | <input type="checkbox"/> |
| <b>H5. Memory</b>                                                                                                                                                        |           |              |                          |                          |                          |                          |                          |
| Minimize memory load. Users should not be required to memorize a lot of information to carry out tasks. Memory load reduces users' capacity to carry out the main tasks. |           |              |                          |                          |                          |                          |                          |
| Item                                                                                                                                                                     | Comments  |              | Very unsatisfied         | Unsatisfied              | Neutral                  | Satisfied                | Very satisfied           |
|                                                                                                                                                                          | Advantage | Disadvantage | 1                        | 2                        | 3                        | 4                        | 5                        |
| Recognition vs. recall (e.g., menu vs. commands).                                                                                                                        |           |              | <input type="checkbox"/> | <input type="checkbox"/> | <input type="checkbox"/> | <input type="checkbox"/> | <input type="checkbox"/> |
| Externalize information through visualization.                                                                                                                           |           |              | <input type="checkbox"/> | <input type="checkbox"/> | <input type="checkbox"/> | <input type="checkbox"/> | <input type="checkbox"/> |
| The ways to execute the system follow perceptual procedures.                                                                                                             |           |              | <input type="checkbox"/> | <input type="checkbox"/> | <input type="checkbox"/> | <input type="checkbox"/> | <input type="checkbox"/> |
| The ways to execute the system follow a hierarchical structure.                                                                                                          |           |              | <input type="checkbox"/> | <input type="checkbox"/> | <input type="checkbox"/> | <input type="checkbox"/> | <input type="checkbox"/> |

| When executing the system, the system initially follows the default values of the setting.                                                                                          |           |              | <input type="checkbox"/> | <input type="checkbox"/> | <input type="checkbox"/> | <input type="checkbox"/> | <input type="checkbox"/> |
|-------------------------------------------------------------------------------------------------------------------------------------------------------------------------------------|-----------|--------------|--------------------------|--------------------------|--------------------------|--------------------------|--------------------------|
| Concrete examples (DD/MM/YY, e.g., 10/20/99).                                                                                                                                       |           |              | <input type="checkbox"/> | <input type="checkbox"/> | <input type="checkbox"/> | <input type="checkbox"/> | <input type="checkbox"/> |
| Generic rules and actions (e.g., drag objects).                                                                                                                                     |           |              | <input type="checkbox"/> | <input type="checkbox"/> | <input type="checkbox"/> | <input type="checkbox"/> | <input type="checkbox"/> |
| <b>H6. Feedback</b>                                                                                                                                                                 |           |              |                          |                          |                          |                          |                          |
| Informative feedback. Users should be given prompt and informative feedback about their actions.                                                                                    |           |              |                          |                          |                          |                          |                          |
| Item                                                                                                                                                                                | Comments  |              | Very unsatisfied         | Unsatisfied              | Neutral                  | Satisfied                | Very satisfied           |
|                                                                                                                                                                                     | Advantage | Disadvantage | 1                        | 2                        | 3                        | 4                        | 5                        |
| Information that can be directly perceived, interpreted, and evaluated.                                                                                                             |           |              | <input type="checkbox"/> | <input type="checkbox"/> | <input type="checkbox"/> | <input type="checkbox"/> | <input type="checkbox"/> |
| The levels of feedback are the same for novice and expert.                                                                                                                          |           |              | <input type="checkbox"/> | <input type="checkbox"/> | <input type="checkbox"/> | <input type="checkbox"/> | <input type="checkbox"/> |
| Concrete and specific, not abstract and general.                                                                                                                                    |           |              | <input type="checkbox"/> | <input type="checkbox"/> | <input type="checkbox"/> | <input type="checkbox"/> | <input type="checkbox"/> |
| The response time is reasonable and not too long.                                                                                                                                   |           |              | <input type="checkbox"/> | <input type="checkbox"/> | <input type="checkbox"/> | <input type="checkbox"/> | <input type="checkbox"/> |
| <b>H7. Flexibility</b>                                                                                                                                                              |           |              |                          |                          |                          |                          |                          |
| Flexibility and efficiency. Users always learn, and users are always different. Give users the flexibility of creating customization and shortcuts to accelerate their performance. |           |              |                          |                          |                          |                          |                          |
| Item                                                                                                                                                                                | Comments  |              | Very unsatisfied         | Unsatisfied              | Neutral                  | Satisfied                | Very satisfied           |

|                                                                                                                                                                      | Advantage | Disadvantage | 1                        | 2                        | 3                        | 4                        | 5                        |
|----------------------------------------------------------------------------------------------------------------------------------------------------------------------|-----------|--------------|--------------------------|--------------------------|--------------------------|--------------------------|--------------------------|
| Shortcuts for experienced users.                                                                                                                                     |           |              | <input type="checkbox"/> | <input type="checkbox"/> | <input type="checkbox"/> | <input type="checkbox"/> | <input type="checkbox"/> |
| Shortcuts or macros for frequently used operations.                                                                                                                  |           |              | <input type="checkbox"/> | <input type="checkbox"/> | <input type="checkbox"/> | <input type="checkbox"/> | <input type="checkbox"/> |
| Skill acquisition through chunking.                                                                                                                                  |           |              | <input type="checkbox"/> | <input type="checkbox"/> | <input type="checkbox"/> | <input type="checkbox"/> | <input type="checkbox"/> |
| <b>H8. Message</b>                                                                                                                                                   |           |              |                          |                          |                          |                          |                          |
| Good error messages. The messages should be informative enough so that users can understand the nature of errors, learn from errors, and recover from errors.        |           |              |                          |                          |                          |                          |                          |
| Item                                                                                                                                                                 | Comments  |              | Very unsatisfied         | Unsatisfied              | Neutral                  | Satisfied                | Very satisfied           |
|                                                                                                                                                                      | Advantage | Disadvantage | 1                        | 2                        | 3                        | 4                        | 5                        |
| Phrased in clear language, avoiding obscure codes. Example of obscure code: "system crashed, error code 147."                                                        |           |              | <input type="checkbox"/> | <input type="checkbox"/> | <input type="checkbox"/> | <input type="checkbox"/> | <input type="checkbox"/> |
| Precise, not vague or general. Example of general comment: "Cannot open document."                                                                                   |           |              | <input type="checkbox"/> | <input type="checkbox"/> | <input type="checkbox"/> | <input type="checkbox"/> | <input type="checkbox"/> |
| The system provides constructive messages when error happens.                                                                                                        |           |              | <input type="checkbox"/> | <input type="checkbox"/> | <input type="checkbox"/> | <input type="checkbox"/> | <input type="checkbox"/> |
| The system provides polite messages when errors occur. Examples of impolite message: "illegal user action," "job aborted," "system was crashed," "fatal error," etc. |           |              | <input type="checkbox"/> | <input type="checkbox"/> | <input type="checkbox"/> | <input type="checkbox"/> | <input type="checkbox"/> |
| <b>H9. Error</b>                                                                                                                                                     |           |              |                          |                          |                          |                          |                          |
| Prevent errors. It is always better to design interfaces that prevent errors from happening in the first place.                                                      |           |              |                          |                          |                          |                          |                          |

| Item                                                                                  | Comments  |              | Very<br>unsatisfied      | Unsatisfied              | Neutral                  | Satisfied                | Very<br>satisfied        |
|---------------------------------------------------------------------------------------|-----------|--------------|--------------------------|--------------------------|--------------------------|--------------------------|--------------------------|
|                                                                                       | Advantage | Disadvantage | 1                        | 2                        | 3                        | 4                        | 5                        |
| Interfaces that make errors impossible.                                               |           |              | <input type="checkbox"/> | <input type="checkbox"/> | <input type="checkbox"/> | <input type="checkbox"/> | <input type="checkbox"/> |
| The system provides avoid modes or uses informative feedback, e.g., different sounds. |           |              | <input type="checkbox"/> | <input type="checkbox"/> | <input type="checkbox"/> | <input type="checkbox"/> | <input type="checkbox"/> |
| Execution error vs. evaluation error.                                                 |           |              | <input type="checkbox"/> | <input type="checkbox"/> | <input type="checkbox"/> | <input type="checkbox"/> | <input type="checkbox"/> |
| The system can prevent various types of slips and mistakes.                           |           |              | <input type="checkbox"/> | <input type="checkbox"/> | <input type="checkbox"/> | <input type="checkbox"/> | <input type="checkbox"/> |

#### H10. Closure

Clear closure. Every task has a beginning and an end. Users should be clearly notified about the completion of a task.

| Item                                                                                                                                         | Comments  |              | Very<br>unsatisfied      | Unsatisfied              | Neutral                  | Satisfied                | Very<br>satisfied        |
|----------------------------------------------------------------------------------------------------------------------------------------------|-----------|--------------|--------------------------|--------------------------|--------------------------|--------------------------|--------------------------|
|                                                                                                                                              | Advantage | Disadvantage | 1                        | 2                        | 3                        | 4                        | 5                        |
| Clear beginning, middle, and end.                                                                                                            |           |              | <input type="checkbox"/> | <input type="checkbox"/> | <input type="checkbox"/> | <input type="checkbox"/> | <input type="checkbox"/> |
| Complete 7-stages of actions.                                                                                                                |           |              | <input type="checkbox"/> | <input type="checkbox"/> | <input type="checkbox"/> | <input type="checkbox"/> | <input type="checkbox"/> |
| Clear feedback to indicate goals are achieved and current stacks of goals can be released. Examples of good closures include many dialogues. |           |              | <input type="checkbox"/> | <input type="checkbox"/> | <input type="checkbox"/> | <input type="checkbox"/> | <input type="checkbox"/> |

**H11. Undo**

Reversible actions. Users should be allowed to recover from errors. Reversible actions also encourage exploratory learning.

| Item                                                                                      | Comments  |              | Very<br>unsatisfied      | Unsatisfied              | Neutral                  | Satisfied                | Very<br>satisfied        |
|-------------------------------------------------------------------------------------------|-----------|--------------|--------------------------|--------------------------|--------------------------|--------------------------|--------------------------|
|                                                                                           | Advantage | Disadvantage | 1                        | 2                        | 3                        | 4                        | 5                        |
| Each single step of a function can be repeated and allow for returning to previous steps. |           |              | <input type="checkbox"/> | <input type="checkbox"/> | <input type="checkbox"/> | <input type="checkbox"/> | <input type="checkbox"/> |
| Each function has multiple steps and users can return to previous steps.                  |           |              | <input type="checkbox"/> | <input type="checkbox"/> | <input type="checkbox"/> | <input type="checkbox"/> | <input type="checkbox"/> |
| The system encourages exploratory learning.                                               |           |              | <input type="checkbox"/> | <input type="checkbox"/> | <input type="checkbox"/> | <input type="checkbox"/> | <input type="checkbox"/> |
| The system can prevent serious errors.                                                    |           |              | <input type="checkbox"/> | <input type="checkbox"/> | <input type="checkbox"/> | <input type="checkbox"/> | <input type="checkbox"/> |

**H12. Language**

Use users' language. The language should always be presented in a form that is understandable to the intended users.

| Item                                         | Comments  |              | Very<br>unsatisfied      | Unsatisfied              | Neutral                  | Satisfied                | Very<br>satisfied        |
|----------------------------------------------|-----------|--------------|--------------------------|--------------------------|--------------------------|--------------------------|--------------------------|
|                                              | Advantage | Disadvantage | 1                        | 2                        | 3                        | 4                        | 5                        |
| Use standard meanings of words.              |           |              | <input type="checkbox"/> | <input type="checkbox"/> | <input type="checkbox"/> | <input type="checkbox"/> | <input type="checkbox"/> |
| Specialized language for specialized groups. |           |              | <input type="checkbox"/> | <input type="checkbox"/> | <input type="checkbox"/> | <input type="checkbox"/> | <input type="checkbox"/> |
| User can define aliases.                     |           |              | <input type="checkbox"/> | <input type="checkbox"/> | <input type="checkbox"/> | <input type="checkbox"/> | <input type="checkbox"/> |

**H13. Control**

Users in control. Do not give users the impression that they are controlled by the systems.

| Item                                                                              | Comments  |              | Very<br>unsatisfied      | Unsatisfied              | Neutral                  | Satisfied                | Very<br>satisfied        |
|-----------------------------------------------------------------------------------|-----------|--------------|--------------------------|--------------------------|--------------------------|--------------------------|--------------------------|
|                                                                                   | Advantage | Disadvantage | 1                        | 2                        | 3                        | 4                        | 5                        |
| Users are initiators of actions, not responders to actions.                       |           |              | <input type="checkbox"/> | <input type="checkbox"/> | <input type="checkbox"/> | <input type="checkbox"/> | <input type="checkbox"/> |
| Avoid surprising actions, unexpected outcomes, tedious sequences of actions, etc. |           |              | <input type="checkbox"/> | <input type="checkbox"/> | <input type="checkbox"/> | <input type="checkbox"/> | <input type="checkbox"/> |

**H14. Document**

Help and documentation. Always provide help when needed.

| Item                                                                                       | Comments  |              | Very<br>unsatisfied      | Unsatisfied              | Neutral                  | Satisfied                | Very<br>satisfied        |
|--------------------------------------------------------------------------------------------|-----------|--------------|--------------------------|--------------------------|--------------------------|--------------------------|--------------------------|
|                                                                                            | Advantage | Disadvantage | 1                        | 2                        | 3                        | 4                        | 5                        |
| The system provides context-sensitive help.                                                |           |              | <input type="checkbox"/> | <input type="checkbox"/> | <input type="checkbox"/> | <input type="checkbox"/> | <input type="checkbox"/> |
| Four types of help: task-oriented, alphabetically ordered, semantically organized, search. |           |              | <input type="checkbox"/> | <input type="checkbox"/> | <input type="checkbox"/> | <input type="checkbox"/> | <input type="checkbox"/> |
| The system has help embedded in contents.                                                  |           |              | <input type="checkbox"/> | <input type="checkbox"/> | <input type="checkbox"/> | <input type="checkbox"/> | <input type="checkbox"/> |
