# Supplementary material for: Determinants of user acceptance of a specific social platform for older adults: An empirical examination of user interface characteristics and behavioral intention
Source: PubMed Central journal article supplement (PMC5570369; doi:10.1371/journal.pone.0180102), 2017-08-24
Supplement: pone.0180102.s002.pdf [file pone.0180102.s002.pdf]

## Appendix 2: TreeIt Technology Acceptance Model Questionnaire

Researcher:

Date:

### Section One: Background Information:

[1] Gender  Male  Female

[2] Age: \_\_\_\_\_ years old

[3] Educational Level:

Elementary School  Junior High  Senior High  Bachelor's Degree

Graduate Degree

[4] Do you have experience in using social network sites?

Yes (Go to question 5 and 6)  No (Please go directly to Section Two)

[5] Your preference in using social network sites (multiple choices):

Facebook  Twitter  google+  LinkedIn  Sina Weibo  Others \_\_\_\_\_

[6] Your habits when using social network sites (multiple choices):

Facebook  Twitter  google+  LinkedIn  Sina Weibo  Others \_\_\_\_\_

### Section Two: TAM Questions:

|                                                                                                  | Strongly disagree        | Disagree                 | Neutral                  | Agree                    | Strongly agree           |
|--------------------------------------------------------------------------------------------------|--------------------------|--------------------------|--------------------------|--------------------------|--------------------------|
| Using the TreeIt system helps me understand my social status.                                    | <input type="checkbox"/> | <input type="checkbox"/> | <input type="checkbox"/> | <input type="checkbox"/> | <input type="checkbox"/> |
| Using the TreeIt system helps me quickly analyze my social status.                               | <input type="checkbox"/> | <input type="checkbox"/> | <input type="checkbox"/> | <input type="checkbox"/> | <input type="checkbox"/> |
| Compared to other SNSs, the TreeIt system provides more complete inspection of my social status. | <input type="checkbox"/> | <input type="checkbox"/> | <input type="checkbox"/> | <input type="checkbox"/> | <input type="checkbox"/> |

|                                                                                              |                          |                          |                          |                          |                          |
|----------------------------------------------------------------------------------------------|--------------------------|--------------------------|--------------------------|--------------------------|--------------------------|
| Compared to other SNSs, it is more convenient to use the TreeIt system.                      | <input type="checkbox"/> | <input type="checkbox"/> | <input type="checkbox"/> | <input type="checkbox"/> | <input type="checkbox"/> |
| Overall, I think the TreeIt system is useful for me.                                         | <input type="checkbox"/> | <input type="checkbox"/> | <input type="checkbox"/> | <input type="checkbox"/> | <input type="checkbox"/> |
| I find the TreeIt system to be easy to use.                                                  | <input type="checkbox"/> | <input type="checkbox"/> | <input type="checkbox"/> | <input type="checkbox"/> | <input type="checkbox"/> |
| I find the TreeIt system easy to learn.                                                      | <input type="checkbox"/> | <input type="checkbox"/> | <input type="checkbox"/> | <input type="checkbox"/> | <input type="checkbox"/> |
| My interaction with the TreeIt system is clear and understandable.                           | <input type="checkbox"/> | <input type="checkbox"/> | <input type="checkbox"/> | <input type="checkbox"/> | <input type="checkbox"/> |
| Compared to other SNSs, the TreeIt system has a clearer and easier operating interface.      | <input type="checkbox"/> | <input type="checkbox"/> | <input type="checkbox"/> | <input type="checkbox"/> | <input type="checkbox"/> |
| Compared to other SNSs, the TreeIt system provides a more humanized operating interface.     | <input type="checkbox"/> | <input type="checkbox"/> | <input type="checkbox"/> | <input type="checkbox"/> | <input type="checkbox"/> |
| Overall, I think the TreeIt system is easy to use.                                           | <input type="checkbox"/> | <input type="checkbox"/> | <input type="checkbox"/> | <input type="checkbox"/> | <input type="checkbox"/> |
| To inspect my social status in the future, I am willing to continue using the TreeIt system. | <input type="checkbox"/> | <input type="checkbox"/> | <input type="checkbox"/> | <input type="checkbox"/> | <input type="checkbox"/> |
| I plan to use the TreeIt system to inspect my social status.                                 | <input type="checkbox"/> | <input type="checkbox"/> | <input type="checkbox"/> | <input type="checkbox"/> | <input type="checkbox"/> |
| I will recommend the TreeIt system to my family and friends.                                 | <input type="checkbox"/> | <input type="checkbox"/> | <input type="checkbox"/> | <input type="checkbox"/> | <input type="checkbox"/> |
| Overall, I have a high intention to use the TreeIt system.                                   | <input type="checkbox"/> | <input type="checkbox"/> | <input type="checkbox"/> | <input type="checkbox"/> | <input type="checkbox"/> |

Thank you for taking time to participate in our survey. We truly value the information you have provided.
